# Supplementary material
Source: Springer Nature journal article supplement (https://www.springermedizin.de/resource/supplementary/12913_2009_1265_MOESM3_ESM.pdf/9527730)
Supplement: MOESM3 [file 9527730]

Million SEK

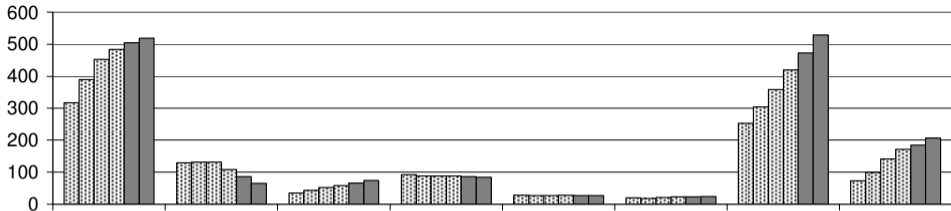

Antineoplastic agents (L01)

Endocrine therapy (L02)

Colony stim factors (L03AA)

Interferon beta (L03AB07 & 08)

Other interferons (L03AB)

Other cytokines (L03AX)

TNF-alpha inhib (L04AB)

Immunosuppressants (L04)
